1 **T cell Homeostatic Imbalance in Placentae from Women with HIV in the**  
2 **absence of Vertical Transmission.**

3

4 Nadia M. Ikumi<sup>1</sup>, Komala Pillay<sup>2,3</sup>, Tamara Tilburgs<sup>4,5</sup>, Thokozile R. Malaba<sup>6</sup>,  
5 Sonwabile Dzanibe<sup>1</sup> Elizabeth Ann L Enninga<sup>7</sup>, Rana Chakraborty<sup>7,8,9</sup>, Mohammed  
6 Lamorde<sup>10</sup>, Landon Myer<sup>6</sup>, Saye Khoo<sup>11</sup>, Heather B Jaspan<sup>1</sup> and Clive M. Gray<sup>1,2,12\*</sup>,  
7 for the DolPHIN-2 Study Group

8

9 <sup>1</sup>Division of Immunology, Institute of Infectious Disease and Molecular Medicine,  
10 University of Cape Town, South Africa

11 <sup>2</sup>National Health Laboratory Services, Groote Schuur Hospital, Cape Town, South  
12 Africa

13 <sup>3</sup>Division of Anatomical Pathology, Department of Pathology, University of Cape  
14 Town, Cape Town, South Africa

15 <sup>4</sup>Division of Immunobiology, Center for Inflammation and Tolerance, Cincinnati  
16 Children's Hospital, Cincinnati OH 45229, USA

17 <sup>5</sup>Department of Pediatrics, University of Cincinnati College of Medicine, Cincinnati  
18 OH 45229, USA

19 <sup>6</sup>Division of Epidemiology and Biostatistics, School of Public Health and Family  
20 Medicine, University of Cape Town, Cape Town, South Africa

21 <sup>7</sup>Department of Obstetrics and Gynecology, Mayo Clinic, Rochester, MN 55905

22 <sup>8</sup>Department of Pediatric and Adolescent Medicine, Mayo Clinic College of Medicine  
23 and Science, Minnesota, USA

24 <sup>9</sup>Department of Immunology, Mayo Clinic, Rochester, MN 55905

25 <sup>10</sup>Infectious Diseases Institute, College of Health Sciences, Makerere University,  
26 Kampala, Uganda

27 <sup>11</sup>Molecular and Clinical Pharmacology, University of Liverpool, Liverpool, UK; Royal  
28 Liverpool and Broadgreen University Hospitals NHS Trust, Liverpool, UK

29 <sup>12</sup>Department of Pathology, University of Cape Town, Cape Town, South Africa

30

31 \*Corresponding author

32 **Running title:** Altered placental T cell immunity in HIV

33

34 **Word count:** Abstract: 206 words, Lay abstract: 192 words; Main text 3494; 48

35 references; 5 Figures and 2 Tables; supplementary figures <25MB

36 **ABSTRACT**

37 **Background:** Implementation of universal antiretroviral therapy (ART) has  
38 significantly lowered vertical transmission rates but has also increased numbers of  
39 HIV-exposed uninfected children (HEU), who remain vulnerable to morbidities. Here,  
40 we investigated whether T cell alterations in the placenta contribute to altered  
41 immune status in HEU.

42 **Methods:** We analyzed T cells from term placentae decidua and villous tissue and  
43 paired cord blood from pregnant women with HIV (PWH) who initiated ART late in  
44 pregnancy (n=21) with pregnant women not living with HIV (PWNH) (n=9).

45 **Results:** Placentae from PWH showed inverted CD4:CD8 ratios and higher  
46 proportions of tissue resident CD8+ T cells in villous tissue relative to control  
47 placentae. CD8+ T cells in the fetal capillaries, which were of fetal origin, positively  
48 correlated with maternal plasma viraemia prior to ART initiation, implying that  
49 imbalanced T cells persisted throughout pregnancy. Additionally, the expanded  
50 memory differentiation of CD8+ T cells was confined to the fetal placental  
51 compartment and cord blood but was not observed in the maternal decidua.

52 **Conclusions:** T cell homeostatic imbalance in the blood circulation of PWH is  
53 reflected in the placenta. The placenta may be a causal link between HIV-induced  
54 maternal immune changes during gestation and altered immunity in newborn infants  
55 in the absence of vertical transmission.

56

57 **Keywords:** CD4, CD8, T cells, placenta, HIV, HEU, HIV-exposed, placenta  
58 pathology, villous tissue

59

60

61 **Lay Summary**

62 The effective prevention of HIV transmission during pregnancy with the rollout of  
63 antiretroviral therapy (ART) has resulted in increased numbers of HIV-exposed  
64 uninfected children (HEU). These children are vulnerable to infections and health  
65 problems and have distorted cellular immune systems at birth. We investigated  
66 whether these immune alterations originate in the placenta, as this fetal organ  
67 maintains life during pregnancy. After collecting placentae at term from pregnant  
68 women living with HIV (PWH), who started ART in the third trimester (n=21) and  
69 from pregnant women not living with HIV (PWNH) (n=9), we isolated T cells from  
70 dissected placental tissue and matching cord blood. Placentae from PWH showed  
71 inverted CD4:CD8 ratios in the placenta and cord blood with higher numbers of  
72 CD8+ T cells in the fetal part of the placenta. These CD8+ T cells mirrored events in  
73 the blood circulation of the mother and the altered balance of T cell immunity in the  
74 PWH was reflected in the placenta. Accordingly, the placenta may be a pivotal link  
75 between HIV-induced maternal immune changes and altered immunity in newborn  
76 infants in the absence of vertical transmission.

77

## 78 **Background**

79 In adults, HIV causes severe immune dysregulation, characterized by systemic  
80 depletion of CD4+ T cells, increased HIV-1 specific CD8+ T cells, inflammation and a  
81 progressive failure of the immune system[1–3]. Initiation of antiretroviral therapy  
82 (ART) has been shown to augment HIV-specific CD4+ T cell responses, but  
83 normalization of the CD4:CD8 T cell ratio does not occur in a large proportion of  
84 people with HIV[4]. In pregnant women living with HIV (PWH), there is evidence that  
85 women who initiate ART before pregnancy are more likely to have adverse birth  
86 outcomes compared to initiation during pregnancy [5].

87

88 Placentae from PWH exhibit increased signs of inflammation and injury affecting  
89 maternal vasculature and circulation[6,7]. Studies also show that using protease  
90 inhibitor-based ART during pregnancy associates with placental injury affecting  
91 maternal vascularization and impaired decidualization [8,9]. In addition, although the  
92 maternal and fetal circulation within the placenta takes place in distinct  
93 compartments, there is evidence that maternal HIV and viral load impacts the fetal  
94 immune system. HIV-exposed uninfected children (HEU) have been shown to have  
95 lower CD4 T cells and CD4:CD8 T cell ratios at birth [10,11] and this appears to be  
96 related to maternal viral loads above 1000 RNA copies/ml [12]. HIV-unexposed  
97 uninfected children (HUU) have an almost completely naïve T cell repertoire, but at  
98 birth HEU can have increased proportions of differentiated immune cells suggestive  
99 of antigen experience *in utero*[10,13]. Indeed, a number of factors including impaired  
100 thymic output and functioning may underlie the immune alterations in HEU[14,15].  
101 Here, we sought to investigate how HIV exposure *in utero* may contribute to altered  
102 HEU immunity[16,17].

103

104 To test the hypothesis that maternal HIV infection is associated with disruption of T  
105 cell homeostasis in the placenta and cord blood from HEU newborns, we examined  
106 term placentae from PWH from a randomized trial in pregnant mothers initiating  
107 dolutegravir versus efavirenz-containing therapy in the third trimester (DoIPHIN-2:  
108 NCT03249181)[18], as well as pregnant women not living with HIV (PWNH),  
109 controls. We show that placentae from PWH have inverted CD4:CD8 ratios with  
110 higher CD8+ T cells in villous tissue relative to control placentae contributing to T cell  
111 homeostatic imbalance in the placenta at birth.

112

113 **Methods**

114 *Cohort*

115 We included 21 placentae with 9 paired cord blood samples from PWH and HEU and  
116 9 placentae from PWNH with 5 cord blood samples from HUU in this study. The  
117 PWH group was nested in the DoIPHIN-2 study recruited from the Gugulethu  
118 Community Health Centre, Cape Town[18]. PWNH were enrolled from Khayelitsha  
119 Site B Midwife Obstetric Unit, Cape Town. All placentae were from term deliveries  
120 (>37 weeks' gestation).

121

122 *Clinical Data collection*

123 As part of DoIPHIN-2, maternal systemic CD4 T cell counts and plasma viral loads  
124 (VL) copies were measured at ART initiation at 28 weeks' gestation (visit 1), 29  
125 weeks (visit 2), 33 weeks (visit 3), 36 weeks (visit 4) and day 14 after delivery (visit  
126 5). The level of HIV-1 RNA detection was 50 copies per ml[18].

127

128 *Placenta and cord blood processing.*

129 Cells were isolated from each placenta as previously described[19] and illustrated in  
130 Supplementary Figure 1. Placentae were collected in RPMI 1640 supplemented with  
131 10% fetal calf serum and penicillin/streptomycin at room temperature and processing  
132 was performed within six hours of delivery. Each placenta was dissected to obtain  
133 the decidua parietalis, basalis and villous tissue. Enzymatic lymphocyte isolation was  
134 performed using Collagenase I and DNase I. The lymphocyte fraction was obtained  
135 following Percoll density centrifugation and incubated with violet amine reactive  
136 viability dye (VIVID, Thermofisher). The cells were then fixed using BD FACS™

137 lysing solution and cryopreserved in liquid nitrogen until analysis. Cord blood  
138 mononuclear cells were isolated on Ficoll, fixed and cryopreserved until analysis.

139

#### 140 *Placenta pathology*

141 Whole placentae were fixed in 10% buffered formalin prior to histopathology.  
142 Specimens were macroscopically examined and samples from the umbilical cord,  
143 placental membranes and placental disk were obtained based on the Amsterdam  
144 Placental Workshop Group Consensus Statement[20]. Briefly, four blocks were  
145 prepared from each placenta; including a roll of the placental membranes, two cross  
146 sections of the umbilical cord; and full-thickness sections of the placental  
147 parenchyma and examined in detail as previously described [21].

148

#### 149 *Flow cytometry*

150 Placental and cord blood cells were labeled with fluorochrome-conjugated  
151 monoclonal antibodies: CD3 (Clone UCHT1), CD4 (Clone SK3), CD8 (Clone SK1),  
152 CD45RA (Clone H100), CD28 (Clone CD28.2), CD14 (Clone MHCD1417) and CD45  
153 (Clone MHCD4530). Samples were acquired using an LSR II flow cytometer (BD  
154 Biosciences). Total CD4+ and CD8+ T cells were expressed as a proportion of CD3+  
155 T cells (Supplementary Figure 2).

156

#### 157 *Immunohistochemistry*

158 Formalin fixed paraffin embedded (FFPE) placenta tissue blocks were cut into 5  $\mu$ M  
159 sections and stained with CD8 (Clone C8/144B), with tonsillar tissue serving as a  
160 control. Briefly, the slides were baked overnight at 56<sup>0</sup>C and rehydrated in xylene  
161 followed by varying concentrations of alcohol and then incubated in 3% hydrogen



162 peroxide. Heat-mediated antigen retrieval was performed using an EDTA buffer  
163 (pH9). The slides were then incubated with 1% Bovine Serum Albumin and stained  
164 with anti-CD8. The images were acquired on Zeiss Axioskop 200 upright  
165 Fluorescence microscope with an AxioCam high resolution colour (HRC) camera.

166

#### 167 *Fluorescence in situ hybridization (FISH)*

168 As there were five male babies, we selected those placental samples to identify the  
169 origin of the infiltrating lymphocytes by looking for the Y chromosome using XY-  
170 FISH. Briefly, the slides were baked at 90<sup>0</sup>C for 15 minutes, deparaffinized in xylene,  
171 dehydrated in 100% ethanol and then placed in 10mM Citric Acid (pH 6.0). The  
172 slides were then dehydrated in varying concentrations of ethanol (70%, 85% and  
173 100%). We then applied a working solution of DXZ1/DYZ3 (Abbott Laboratories, Des  
174 Plaines, IL, USA) to the target areas, co-denatured with a ThermoBrite (Abbott  
175 Laboratories) and hybridized overnight at 37<sup>0</sup>C. The slides were then counter stained  
176 with 4'-6'-diamidino-2-phenylindole (DAPI) (Vector Laboratories). Tissue samples  
177 were scanned and the qualitative result was determined based on observed signal  
178 patterns by CytoVision (Leica Biosystems, Germany).

179

#### 180 *Statistics*

181 All flow cytometry data were analyzed using FlowJo version 10 (Treestar). Statistical  
182 analyses were performed using Prism version 8 (Graphpad Software), STATA  
183 version 12.0 (Stata Corporation) or R[22]. Immunohistochemistry cell counts were  
184 performed using Image J Fiji version 2 (WS Rasband, National Institute of Health).  
185 Tests of significance were performed using Mann-Whitney *U* and Kruskal-Wallis  
186 tests for intergroup comparisons. The associations between cell proportions and

187 maternal viral load or CD4 T cell counts were assessed using simple linear  
188 regression. All bivariate analyses including maternal and infant characteristics, and  
189 placental pathology stratified by HIV-exposure or by ART regimen were compared  
190 using Chi<sup>2</sup> or Fisher's exact test and Wilcoxon rank-sum tests.

191

### 192 *Study approval*

193 The study protocol, informed consent and all data collection tools were approved by  
194 the University of Cape Town, Human Research Ethics Committee (096/2017).  
195 Written and signed informed consent was obtained from all participants, including  
196 collection of placentae prior to study inclusion.

197

## 198 **Results**

### 199 *Participant Characteristics*

200 Maternal and newborn infant characteristics are shown in Table 1. No significant  
201 differences in maternal age were noted between PWNH and PWH at enrolment, with  
202 the median gestational age (GA) being 30 weeks and 28 weeks between the groups.  
203 PWH were more likely to be multigravida (p=0.003). Median GA at delivery was 40  
204 weeks in PWNH and 39 weeks in the PWH (p=0.03) and there was a lower  
205 birthweight trend in HEU (p=0.07). We collected placentae from 21 PWH: 16 (76.2%)  
206 receiving efavirenz (EFV+TDF+3TC) and 5 (23.8%) receiving dolutegravir  
207 (DTG+TDF+3TC), shown in Supplementary Table 1. Median CD4 count at ART  
208 initiation was 358 cells/mm<sup>3</sup> (IQR 278–477), with no difference between ART groups  
209 (Supplementary Table 2). The median VL at ART initiation was 4.54 log<sub>10</sub> RNA  
210 copies/ml (IQR 3.85–4.80) in the EFV group versus 3.83 log<sub>10</sub> RNA copies/ml (3.49–  
211 3.83) in the DTG group, with a combined viraemia of 4.28 log<sub>10</sub> RNA copies/ml

212 (Supplementary Table 2). Both ART groups were on treatment for a median of 84  
213 days IQR (44-105) and women in the DTG arm achieved viral suppression at a faster  
214 rate (cut off  $\leq 50$  copies/ml or  $1.69 \log_{10}$  RNA copies/ml) at 4 weeks versus 2 weeks  
215 after delivery (Supplementary Table 2 and [18]). For the purposes of this study, we  
216 combined the placentae from two ART groups, as there were only 5 collected from  
217 the DTG arm.

218

### 219 *Placental weight is altered by HIV*

220 Table 2 shows placenta characteristics and pathology stratified by HIV status.  
221 PWNH had significantly larger placentae (468g, IQR 426-533) compared to the PWH  
222 (394g, IQR 343-469;  $p=0.02$ ), with 38% of placentae in PWH being  $<10^{\text{th}}$  percentile  
223 weight-for-gestation compared to 0% in PWNH. These differences were also  
224 reflected in the fetal-placental (FP) ratios, where all cases with FP ratios  $>90^{\text{th}}$   
225 percentile were in the PWH cases ( $p=0.02$ ). Placental histopathology identified 2  
226 cases (9.5%) of chronic deciduitis and 6 cases (28.6%) of MVM, all in the PWH.  
227 There were no significant differences in the incidence of meconium exposure and  
228 chorioamnionitis between PWH and PWNH, and there was no evidence of villitis of  
229 unknown etiology (VUE) in any of the placentae. There were no significant  
230 differences in the placental weight, FP ratio and placental pathology between the two  
231 ART groups (Supplementary Table 3).

232

### 233 *HIV infection during pregnancy alters placental CD4+ and CD8+ T cell proportions*

234 Figure 1A shows significantly lower proportions of CD4+ T cells in decidua parietalis  
235 and basalis, but not in the villous tissue, comparing placentae from PWH with  
236 PWNH. The proportion of CD8+ T cells was significantly increased (Figure 1A) in all

237 three placental compartments resulting in significantly lower CD4:CD8 T cell ratios in  
238 the three placental tissues from PWH (Figure 1B). Notably, the inverted CD4:CD8  
239 ratio in villous tissue was due to the increased CD8+ T cells in the villous tissue. The  
240 inverted CD4:CD8 ratio was partially reflected in cord blood from HEU (Figures 1B).  
241 No differences were identified in T cell proportions when stratified by the different  
242 ART regimens (Supplementary Figure 3). The proportion of CD4+ and CD8+ T cells  
243 in the placenta was not associated with placental weight, gravidity or gestational age  
244 at delivery (Supplementary Figures 4, 5 and 6).

245

246 Maternal absolute peripheral blood CD4 T cell counts, measured pre-ART at a  
247 median of 28 weeks' gestation, positively correlated with the proportion of CD4+ T  
248 cells in the decidua and negatively correlated with the proportion of CD8+ T cells in  
249 decidua and villous tissue (Figure 1C and D). A similar trend was observed in cord  
250 blood. Thus, the inverted placental tissue CD4:CD8+ T cell ratios appeared to reflect  
251 the maternal peripheral immune status but was mirrored to a lesser extent in the  
252 cord blood of HEU. This correlation was temporally dissociated, where correlations  
253 were made between blood measured at 28 weeks and placentae measured at 38-40  
254 weeks of gestation, suggesting that inverted T cell ratios persisted throughout  
255 pregnancy.

256

257 *Maternal viral load prior to ART initiation correlates with placental, but not cord*  
258 *blood, CD4+ and CD8+ T cell proportions*

259 Maternal viraemia dropped over time from enrolment to delivery (-12 weeks  
260 beforehand), where PWH receiving DTG decreased at a faster rate (Figure 2A)[18].

261 As expected, the enrolment plasma viraemia, ranging from 1.69 - 6.0 log<sub>10</sub> RNA

262 copies/ml, significantly inversely correlated with the absolute maternal peripheral  
263 blood CD4+ T cell count determined pre-ART, at enrolment (Figure 2B). Pre-ART  
264 viremia also showed a significant negative correlation with proportions of CD4+ T  
265 cells in the decidua parietalis and basalis (Figure 2C) and a positive correlation with  
266 CD8+ T cells in the decidua parietalis, basalis and villous tissue at delivery (Figure  
267 2D). The association between maternal viral load over time and the proportions of  
268 decidual CD4+ and CD8+ T cells were maintained at -8 weeks and -4 weeks before  
269 delivery for CD4+ T cells (Supplementary Figure 7) and up to -8 weeks before  
270 delivery for CD8+ T cells (Supplementary Figure 8). Maternal viremia did not  
271 correlate with the proportion of T cells in the cord blood (Figure 2C and 2D),  
272 suggesting that maternal viremia (pre- and post-ART initiation) can influence the  
273 homeostatic balance of T cells in the placenta, but not in the “newborn” immune  
274 compartment.

275

276 *Immunohistochemistry confirms anatomical location and fetal origin of CD8+ T cells*  
277 *in villous tissue*

278 Analysis of placental villi from 13 PWH and 3 PWNH controls showed the presence  
279 of CD8+ cells in the fetal capillaries (Figure 3A). The numbers of CD8+ T cells  
280 positively correlated with pre-ART maternal viremia (Figure 3B), confirming the flow  
281 cytometric analysis (Figures 1A, 2D). Using FISH to detect X and Y chromosomes in  
282 cells located within the villi from 5 placentae with male births, we confirmed the  
283 presence of male (fetal) cells in fetal capillaries (Figure 3C). Thus, the  
284 immunohistochemistry analysis confirms the anatomical location and fetal origin of  
285 the increased proportions of CD8+ T cells in villous tissue. The fetal (male) origin of

286 the CD8+ T cells in placental villi is consistent with the absence of villitis of unknown  
287 etiology (VUE), a lesion that is characterized by maternal immune infiltrates[23,24].

288

289 *HIV exposure increases differentiation of CD8+ T cells in placental villi and fetal cord*  
290 *blood, but not in the maternal placental compartments*

291 CD45RA and CD28 were used to identify the proportions of naïve  
292 (CD45RA+CD28+), early differentiated (ED, CD45RA-CD28+), late differentiated  
293 (LD, CD45RA-CD28-) and terminally differentiated (TD, CD45RA+CD28-) memory  
294 CD4+ and CD8+ T cells from villous tissue and matching cord blood (Figure 4A). We  
295 observed significantly lower proportions of naïve CD8+ T cells and significantly  
296 higher proportions of LD CD8+ T cells in villous tissue and cord blood of HEU  
297 compared to HUU (Figure 4B). The CD4+ T cells in the villous tissue were  
298 predominantly of a naïve and ED phenotype while the cord blood cells were  
299 predominantly naïve. There were no significant differences in CD4+ T cell  
300 differentiation state based on HIV-exposure (Supplementary Figure 9). In addition,  
301 no significant differences in the stage of CD4+ and CD8+ T cell differentiation in the  
302 decidua was observed between the HIV groups (Supplementary Figure 10). Thus,  
303 the increased differentiation state of CD8+ T cells is confined to the fetal placental  
304 and cord blood compartments and not observed in the maternal placental  
305 compartments. There was no correlation between maternal pre-ART viremia and  
306 memory stage of CD8+ T cells in placental villous tissue and cord blood (data not  
307 shown). We additionally showed that there was no association between villous tissue  
308 CD8+ T cell memory differentiation and reported adverse events in the infant during  
309 the first 12 weeks of life (Supplementary Figure 11).

310

311 **Discussion**

312 We present data from a unique cohort of PWH who initiated ART late in pregnancy  
313 and show that maternal HIV infection has a clear impact on T cell subsets in the  
314 decidua, villous tissue and cord blood. As the decidua and decidual immune cells are  
315 of maternal origin, it may not be surprising to find such a footprint[25]. Maternal HIV  
316 infection likely affects and kills maternal decidual CD4+ T cells and fewer peripheral  
317 blood T cells may traffic to decidual tissue; chemokine gradients have been shown to  
318 play a key role in the trafficking of maternal T cells into the decidua during  
319 pregnancy[26]. We show that in contrast to the decidua, the inverted CD4:CD8 ratio  
320 in the villous tissue was largely due to an increased proportion of CD8+ T cells and  
321 not, as observed in the other tissues, due to a decrease in CD4+ T cells. These  
322 CD8+ T cells were of an early-late differentiated phenotype, suggestive of previous  
323 antigen experience[27,28].

324

325 The human placenta has two circulatory compartments: the utero-placental unit for  
326 the trafficking of maternal blood and the feto-placental unit for the fetal blood  
327 circulation[29,30]. Therefore, cells in the villous tissue are likely to be predominantly  
328 from the placental reservoir. A key question is whether the increased CD8+ T cell  
329 differentiation in villi and cord blood is due to direct exposure to HIV antigens,  
330 presence of other pathogens (e.g. CMV) or increased levels of other non-infectious  
331 inflammatory cues in placentae of PWH. Viral particles, structural and core HIV  
332 proteins have been shown to cross the placental barrier in the absence of fetal  
333 infection leading to altered immune profiles in HEU infants[31,32]. A number of  
334 studies also describe HIV-specific T cell responses in HEU infants, possibly primed  
335 by exposure to HIV antigens *in utero* [16,33,34].

336

337 The lower proportion of naïve cells and increased memory T cells reflected in villous  
338 tissue and cord blood mirror previous studies; HEU infants have been shown to have  
339 reduced CD4+ T cell numbers and increased CD8+ T cells compared to HUU infants  
340 at birth[35,36]. HEU infants have also been shown to have lower naïve cells thought  
341 to be due to thymic involution and frequent stimulation and expansion of the antigen-  
342 specific T cells in an effort to regenerate the T cell pool[14,15]. Whether the same  
343 findings would be recapitulated in PWH with preconception suppressed viral loads is  
344 unknown. Nevertheless, this study afforded us a unique opportunity to investigate  
345 the impact of starting ART late in pregnancy and how this affected placental  
346 immunity. Being able to compare this with women who are consistently on ART  
347 throughout pregnancy would reveal whether long-term viral suppression creates a  
348 more normalized immune balance in the placenta.

349

350 It was not possible to tease out the impact between HIV and ART on the  
351 placenta/fetus. There is evidence that some ART can cross the placenta [37,38].  
352 Additional studies show that perinatal drug exposure associates with lower T cell  
353 counts in the first two years in HEU infants[39]. Although we cannot discount the  
354 effect of ART alone on the placenta, the parent study did report on minimal effects of  
355 ART on the newborn child[18]. A limitation of our study was only having maternal  
356 CD4 and CD8 T cell counts at week 28 gestation in PWH and no equivalent  
357 measures in PWNH. We therefore could not directly compare the impact of HIV/ART  
358 exposure on systemic T cells compared to placental T cells at delivery and nor in  
359 healthy mothers.

360



361 The elevated proportions of CD8+ T cells found embedded in the villi from PWH  
362 were shown to be sequestered within the fetal capillaries. These CD8+ T cells within  
363 villi were proportional to maternal viremia. The absence of overt VUE corroborates  
364 the finding that expanded CD8+ T cell fractions are of fetal and not maternal origin.  
365 Previous studies have suggested that the presence of T cells in the villi during  
366 normal pregnancy reflect VUE[24]. However, there is emerging evidence, using IHC  
367 staining of villi sections from early elective termination placentae, of the presence of  
368 CD45+  $\alpha\beta$  T cells, although these cells were undetectable at term[40]. In a separate  
369 study, where there were no reported maternal infections, the villous tissue was  
370 shown to contain a mixture of fetal and maternal immune cells[41]. We cannot  
371 discount the possibility that there was also a mix of maternal and fetal CD8+ T cells  
372 in placental villi in our study.

373

374 Here, we demonstrate that within the feto-placental unit, there are differences  
375 between the T cell profiles in the villi and cord blood. We postulate that the cells we  
376 characterized in the villi may be a combination of cells within the villi, and cells  
377 attached to the fetal capillaries. Contaminating circulating cord blood cells in this  
378 fraction cannot be completely ruled out but is minimized by extensive washing of the  
379 tissues prior to isolation. Moreover, the phenotypic differences between villous and  
380 cord blood T cells as presented here suggest that the villous T cells do not include  
381 large proportions of circulating T cells. The increased differentiation state of CD8+ T  
382 cells in the villi may be due to exposure to antigens within the villous  
383 microenvironment as well as the mechanisms of immune activation leading to T cells  
384 adhesion and extravasation. Attempts to make a direct connection between the  
385 elevated numbers and proportions of CD8+ T cells found in the villous tissue with

386 adverse health events in the first few weeks after birth, revealed no association;  
387 most events were resolving rashes.

388

389 Of particular note, women were ART naïve during the first and second trimester and  
390 it is likely that prolonged HIV exposure may have contributed to altered placental  
391 development and the significantly lower placental weight observed. Interestingly, all  
392 cases of maternal vascular malperfusion (MVM) were reported in placentae from  
393 PWH and possibly reflects placental injury affecting maternal vasculature and  
394 perfusion and increasing the risk of an adverse birth outcome[42]. We have  
395 previously reported on MVM in placentae from PWH on long-term ART, an incidence  
396 of about 27% overall, similar to Kalk *et al* [6,21]. It is likely that HIV and/or ART  
397 exposure alters factors involved in vascular development, resulting in placental  
398 insufficiency and increased risk of adverse birth outcomes[8,9,43].

399

400 In conclusion, we provide evidence that *in utero* exposure to HIV results in an altered  
401 immune balance in both the utero-placental and feto-placental compartments.  
402 Despite the initiation of ART in the third trimester, resulting in either full or partial  
403 maternal viral suppression by the time of delivery, there was a significant imbalance  
404 in term placental T cell homeostasis and to a lesser degree in the cord blood.  
405 Overall, our results suggest that maternal immunity leaves a footprint in the placenta  
406 that may shape the neonatal/infant immune landscape.

407

408

409 **Author contributions**

410 NMI, ML, SK, LM, HBJ, CMG: Conceptualization and design of the study

411 NMI, TT: Panel design, sample preparation and development of methods

412 KP: Histopathology scoring and interpretation

413 NMI, TRM and SD: Statistical analysis

414 NMI, TT, KP, TM, LM, EAE, RC, HBJ, CMG: Writing the manuscript

415

416 **Acknowledgments**

417 We wish to thank all the study participants in this study; all the members of the

418 DOLPHIN-2 clinical trial and INFANT placenta study. We also wish to thank

419 Nonzwakazi Bangani, Goitseone Thamae, Michelle Barboure, Berenice Alinde and

420 Lizette Fick for their expert assistance in sample processing and Dr Amsha

421 Ramburan for capturing the FISH images.

422

423

424 **Footnotes**

425 **Conflict of interest statement**

426 The authors have declared that no conflict of interest exists.

427

428 **Funding**

429 This research was supported by a Fellowship to NMI from the AXA Research Fund,

430 Paris and partly through R01HD102050-01. The content is solely the responsibility of

431 the authors and does not necessarily represent the official views of those of the AXA

432 Research Fund. The research is part of the DOLPHIN-2 clinical trial sponsored by

433 UNITAID (ClinicalTrials.gov NCT03249181).

434

435 **Corresponding Author**

436 Clive M Gray, Division of Immunology, Institute of Infectious Disease and Molecular

437 Medicine, Falmouth Building, Faculty of Health Sciences, University of Cape Town,

438 Anzio Road, Observatory, Cape Town, South Africa, 7925; Tel: +27 21 406 6616;

439 Email: [clive.gray@uct.ac.za](mailto:clive.gray@uct.ac.za)

440

441

442

443 **Figure Legends**

444 **Figure 1: Proportions of T cells in the placenta and cord blood**

445 **(A)** Box plots (showing medians and interquartile ranges) of CD3+CD4+CD8- T cells  
446 and CD3+CD4-CD8+ T cell proportions isolated from the decidua parietalis, decidua  
447 basalis, villous tissue and cord blood from Pregnant Women not living with HIV  
448 (PWNH) and Pregnant Women with HIV (PWH) and HIV unexposed uninfected  
449 (HUU) and HIV exposed uninfected (HEU) cord bloods. **(B)** Box plots (showing  
450 medians and interquartile ranges) of CD4:CD8 T cell ratios in the decidua parietalis,  
451 decidua basalis, villous tissue and cord blood from Pregnant Women not living with  
452 HIV (PWNH) and Pregnant Women with HIV (PWH) and HIV unexposed and  
453 uninfected (HUU) and HIV exposed uninfected (HEU) cord bloods. Tests of  
454 significance were performed using the Mann-Whitney *U* test. **(C)** Correlation plots  
455 between the absolute maternal CD4 count at 28 weeks' gestation prior to ART  
456 initiation and the proportion of CD4+ T cells isolated from the decidua parietalis,  
457 basalis, villous tissue and cord blood. Statistical analysis was performed using the  
458 Spearman rank test and the grey shaded areas represent the 95% confidence  
459 intervals. **(D)** Correlation plots between the absolute maternal CD4 count at 28  
460 weeks' gestation prior to ART initiation and the proportion of CD8+ T cells isolated  
461 from the decidua parietalis, basalis, villous tissue and cord blood. Statistical analysis  
462 was performed using the Spearman rank test and the grey shaded areas represent  
463 the 95% confidence intervals.

464

465 **Figure 2: Proportions of CD4+ and CD8+ T cells in the placenta and maternal**  
466 **viral load**

467 **(A)** Line plot depicting participant viral load trajectories over time at ART initiation  
468 which was at 28 weeks' gestation (VLV1, 12 weeks before delivery), 29 weeks'  
469 gestation (VLV2, 8 weeks before delivery), 33 weeks' gestation (VLV3, 4 weeks  
470 before delivery), 36 weeks' gestation (VLV4, 2 weeks before delivery) and at day 14  
471 after delivery (VLV5, +/- 2 weeks after delivery). The women received efavirenz (EFV  
472 + TDF + 3TC) (denoted in black) and dolutegravir (DTG + TDF + 3TC) (denoted in  
473 blue). **(B)** Correlation plot between maternal systemic absolute CD4 counts at  
474 enrolment prior to ART initiation with maternal viral load at enrolment and ART  
475 initiation (28 weeks GA). Statistical analysis was performed using the Spearman  
476 rank test and the grey shaded area represents the 95% confidence intervals. **(C)**  
477 Correlation plots between CD4+ T cell proportions in the placenta and maternal viral  
478 load at enrolment and ART initiation (28 weeks GA) in the decidua parietalis, basalis,  
479 villous tissue and cord blood. Statistical analysis was performed using the Spearman  
480 rank test and the grey shaded area represents the 95% confidence intervals. **(D)**  
481 Correlation plots between CD8+ T cell proportions in the placenta and maternal viral  
482 load at enrolment and ART initiation (28 weeks GA) in the decidua parietalis, basalis,  
483 villous tissue and cord blood. Statistical analysis was performed using the Spearman  
484 rank test and the grey shaded area represents the 95% confidence intervals.

485

### 486 **Figure 3: Anatomical location of CD8+ T cells in the villous tissue**

487 **(A)** Representative immunohistochemical stained images of CD8+ T cells in villous  
488 tissue sections denoted in brown dots and black arrows in the villi of placentae from  
489 HIV-infected and -uninfected mothers (40x magnification). **(B)** Correlation plot  
490 between the density of tissue-bound CD8+ T cells in the villi and maternal viral load  
491 at ART initiation (pre-ART). Statistical analysis was performed using the Spearman

492 rank test and the black curved lines represent the 95% confidence intervals. **(C)**  
493 Representative Fluorescence in situ Hybridization (FISH) images of lymphocytes  
494 (white arrows) in the villous tissue from placentas from male infants. The X  
495 chromosome is denoted in green and Y chromosome denoted in red (digitally  
496 scanned slides).

497

#### 498 **Figure 4: Memory phenotype of CD4 and CD8 T cells in the Villous Tissue**

499 **(A)** Representative flow cytometry contour plots of Naïve, Early differentiated (ED),  
500 Late differentiated (LD) and Terminally differentiated (TD) CD4+ T cells and CD8+ T  
501 cells in the villous tissue (VT; upper panel) of placentae from PWNH and PWH and  
502 cord blood from HIV unexposed and uninfected (HUU) and HIV exposed uninfected  
503 (HEU). **(B)** Box plots (showing medians and interquartile ranges) of CD8+ Naïve,  
504 Early differentiated (ED), Late differentiated (LD) and Terminally differentiated (TD) T  
505 cells in the villous tissue and cord blood from HIV unexposed and uninfected (HUU)  
506 and HIV exposed uninfected (HEU). Tests of significance were performed using the  
507 Mann-Whitney *U* test.

508

#### 509 **Supplementary Figures**

##### 510 **Supplementary Figure 1: Lymphocyte isolation from the human placenta**

511 Stepwise isolation of lymphocytes from the human placenta decidua parietalis (DP),  
512 decidua basalis (DB) and villous tissue (VT): (1) dissection of the whole placenta; (2)  
513 multiple rounds of maternal blood rinsing to avoid contamination followed by  
514 enzymatic digestion of each dissected tissue; (3) lymphocyte separation obtained by  
515 Percoll density centrifugation; (4) cryopreservation of fixed cells and  
516 immunophenotyping using flow cytometry. Image created with Biorender.com.

517

518 **Supplementary Figure 2: Gating strategy to delineate CD3+ T cells**

519 Representative flow cytometry dot plots depicting the gating strategy to delineate  
520 CD4+ and CD8+ T cells gated from a live CD45+ CD14- CD3+ population in the  
521 placenta.

522

523 **Supplementary Figure 3: Proportions of T cells in the placenta and cord blood**  
524 **by ART group**

525 **(A)** Box plots (showing medians and interquartile ranges) of CD3+CD4+CD8- T cells  
526 and CD3+CD4-CD8+ T cell proportions isolated from the decidua parietalis, decidua  
527 basalis, villous tissue and cord blood from Pregnant Women not living with HIV  
528 (PWNH) and Pregnant Women with HIV (PWH) and HIV unexposed uninfected  
529 (HUU) and HIV exposed uninfected (HEU) cord bloods. **(B)** Box plots (showing  
530 medians and interquartile ranges) of CD4:CD8 T cell ratios in the decidua parietalis,  
531 decidua basalis, villous tissue and cord blood from Pregnant Women not living with  
532 HIV (PWNH) and Pregnant Women with HIV (PWH) and HIV unexposed and  
533 uninfected (HUU) and HIV exposed uninfected (HEU) cord bloods. Tests of  
534 significance were performed using the Mann-Whitney *U* test.

535

536 **Supplementary Figure 4: Proportions of T cells in the placenta and cord blood**  
537 **stratified by placental weight**

538 (A) Histogram (showing medians and interquartile ranges) of CD3+CD4+CD8- T  
539 cells, (B) CD3+CD4-CD8+ T cells proportions and (C) CD4:CD8 T cell ratios  
540 stratified by placental weight in placentas from Pregnant Women not living with HIV  
541 (PWNH) and Pregnant Women with HIV (PWH). Tests of significance were



542 performed using the Kruskal-Wallis test.

543

544 **Supplementary Figure 5: Proportions of T cells in the placenta and cord blood**  
545 **stratified by gravidity**

546 (A) Histogram (showing medians and interquartile ranges) of CD3+CD4+CD8- T  
547 cells, (B) CD3+CD4-CD8+ T cells proportions and (C) CD4:CD8 T cell ratios  
548 stratified by gravidity in placentas from Pregnant Women not living with HIV (PWNH)  
549 and Pregnant Women with HIV (PWH). Tests of significance were performed using  
550 the Kruskal-Wallis test.

551

552 **Supplementary Figure 6: Proportions of T cells in the placenta and cord blood**  
553 **stratified by gestational age at delivery**

554 (A) Histogram (showing medians and interquartile ranges) of CD3+CD4+CD8- T  
555 cells, (B) CD3+CD4-CD8+ T cells proportions and (C) CD4:CD8 T cell ratios  
556 stratified by gestational age at delivery in placentas from Pregnant Women not living  
557 with HIV (PWNH) and Pregnant Women with HIV (PWH). Tests of significance were  
558 performed using the Kruskal-Wallis test.

559

560 **Supplementary Figure 7: Proportions of CD4+ T cells in the placenta, cord**  
561 **blood and maternal viral load**

562 Correlation plots between CD4+ T cell proportions in the placenta and cord blood  
563 and maternal viral load at 29 weeks' gestation (VLV2, 8 weeks before delivery), 33  
564 weeks' gestation (VLV3, 4 weeks before delivery) and 36 weeks' gestation (VLV4, 2  
565 weeks before delivery) in the decidua parietalis, basalis, villous tissue and cord  
566 blood. Statistical analysis was performed using the Spearman rank test and the grey

567 shaded area represents the 95% confidence intervals.

568

569 **Supplementary Figure 8: Proportions of CD8+ T cells in the placenta, cord**

570 **blood and maternal viral load**

571 Correlation plots between CD8+ T cell proportions in the placenta and cord blood  
572 and maternal viral load at 29 weeks' gestation (VLV2, 8 weeks before delivery), 33  
573 weeks' gestation (VLV3, 4 weeks before delivery) and 36 weeks' gestation (VLV4, 2  
574 weeks before delivery) in the decidua parietalis, basalis, villous tissue and cord  
575 blood. Statistical analysis was performed using the Spearman rank test and the grey  
576 shaded area represents the 95% confidence intervals.

577

578 **Supplementary Figure 9: Memory differentiation of CD4+ T cells in the villous**

579 **tissue and cord blood**

580 Box plots (showing medians and interquartile ranges) of CD4+ Naïve, Early  
581 differentiated (ED), Late differentiated (LD) and Terminally differentiated (TD) T cells  
582 in the villous tissue (VT; upper panel) and cord blood (CB; lower panel) from HIV-  
583 uninfected (MHIV neg) and infected mothers (MHIV pos) and HIV unexposed and  
584 uninfected (HUU) and HIV exposed uninfected (HEU) cord bloods. Tests of  
585 significance were performed using the Mann-Whitney *U* test.

586

587 **Supplementary Figure 10: Memory differentiation of CD4 and CD8 T cells in the**

588 **decidua parietalis and decidua basalis**

589 **(A)** Representative flow cytometry contour plots of Naïve, Early differentiated (ED),  
590 Late differentiated (LD) and Terminally differentiated (TD) CD4+ T cells and CD8+ T  
591 cells in the decidua parietalis and basalis of placentae from PWNH and PWH. **(B)**

592 Box plots (showing medians and interquartile ranges) of CD4+ and **(C)** CD8+ Naïve,  
593 Early differentiated (ED), Late differentiated (LD) and Terminally differentiated (TD) T  
594 cells in the decidua parietalis and basalis of placentae from PWNH and PWH.

595

596 **Supplementary Figure 11: Proportion of CD8+ T cells in the Villous Tissue and**  
597 **Adverse Events in HEU in the first three months of life.**

598 Scatter plot showing the proportion of CD8+ T cells delineated by naïve, early  
599 differentiated memory, late differentiated and terminally differentiated memory in  
600 HEU infants comparing adverse events with no events reported.

601

602

603 **References**

- 604 1. Okoye AA, Picker LJ. CD4 + T-cell depletion in HIV infection: mechanisms of  
605 immunological failure. *Immunol Rev* [Internet]. 2013 Jul;254(1):54–64.  
606 Available from: <http://doi.wiley.com/10.1111/imr.12066>
- 607 2. Demers KR, Makedonas G, Buggert M, et al. Temporal Dynamics of CD8+ T  
608 Cell Effector Responses during Primary HIV Infection. Douek DC, editor.  
609 *PLOS Pathog* [Internet]. 2016 Aug 3;12(8):e1005805. Available from:  
610 <http://dx.plos.org/10.1371/journal.ppat.1005805>
- 611 3. Hileman CO, Funderburg NT. Inflammation, Immune Activation, and  
612 Antiretroviral Therapy in HIV. *Curr HIV/AIDS Rep* [Internet]. 2017;14(3):93–  
613 100. Available from: <http://www.ncbi.nlm.nih.gov/pubmed/28434169>
- 614 4. Okhai H, Vivancos-Gallego MJ, Hill T, Sabin CA. CD4+:CD8+ T Cell Ratio  
615 Normalization and the Development of AIDS Events in People with HIV  
616 Starting Antiretroviral Therapy. *AIDS Res Hum Retroviruses* [Internet]. 2020  
617 Oct 1;36(10):808–16. Available from:  
618 <https://www.liebertpub.com/doi/10.1089/aid.2020.0106>
- 619 5. Uthman OA, Nachega JB, Anderson J, et al. Timing of initiation of antiretroviral  
620 therapy and adverse pregnancy outcomes: a systematic review and meta-  
621 analysis. *Lancet HIV* [Internet]. 2017 Jan;4(1):e21–30. Available from:  
622 <https://linkinghub.elsevier.com/retrieve/pii/S2352301816301953>
- 623 6. Kalk E, Schubert P, Bettinger JA, et al. Placental pathology in HIV infection at  
624 term: a comparison with HIV-uninfected women. *Trop Med Int Health* [Internet].  
625 2017;22(5):604–13. Available from:  
626 <http://www.ncbi.nlm.nih.gov/pubmed/28214384>
- 627 7. Mwanyumba F, Gaillard P, Inion I, et al. Placental Inflammation and Perinatal

- 628           Transmission of HIV-1. JAIDS J Acquir Immune Defic Syndr [Internet]. 2002  
629           Mar;29(3):262–9. Available from: [http://journals.lww.com/00126334-](http://journals.lww.com/00126334-200203010-00006)  
630           200203010-00006
- 631    8.    Mohammadi H, Papp E, Cahill L, et al. HIV antiretroviral exposure in  
632           pregnancy induces detrimental placenta vascular changes that are rescued by  
633           progesterone supplementation. Sci Rep [Internet]. 2018 Dec 26;8(1):6552.  
634           Available from: <http://www.nature.com/articles/s41598-018-24680-w>
- 635    9.    Kala S, Dunk C, Acosta S, Serghides L. Periconceptional exposure to  
636           lopinavir, but not darunavir, impairs decidualization: a potential mechanism  
637           leading to poor birth outcomes in HIV-positive pregnancies. Hum Reprod  
638           [Internet]. 2020 Aug 1;35(8):1781–96. Available from:  
639           <https://academic.oup.com/humrep/article/35/8/1781/5876549>
- 640    10.   Clerici M, Saresella M, Colombo F, et al. T-lymphocyte maturation  
641           abnormalities in uninfected newborns and children with vertical exposure to  
642           HIV. Blood [Internet]. 2000 Dec 1;96(12):3866–71. Available from:  
643           <http://www.ncbi.nlm.nih.gov/pubmed/11090071>
- 644    11.   Abu-Raya B, Kollmann TR, Marchant A, MacGillivray DM. The Immune  
645           System of HIV-Exposed Uninfected Infants. Front Immunol [Internet].  
646           2016;7:383. Available from: <http://www.ncbi.nlm.nih.gov/pubmed/27733852>
- 647    12.   Kakkar F, Lamarre V, Ducruet T, et al. Impact of maternal HIV-1 viremia on  
648           lymphocyte subsets among HIV-exposed uninfected infants: protective  
649           mechanism or immunodeficiency. BMC Infect Dis [Internet]. 2014 May  
650           5;14:236. Available from: <http://www.ncbi.nlm.nih.gov/pubmed/24885498>
- 651    13.   Ono E, Santos AMN dos, Succi RC de M, et al. Imbalance of naive and  
652           memory T lymphocytes with sustained high cellular activation during the first

- 653 year of life from uninfected children born to HIV-1-infected mothers on HAART.  
654 Brazilian J Med Biol Res [Internet]. 2008 Aug;41(8):700–8. Available from:  
655 [http://www.scielo.br/scielo.php?script=sci\\_arttext&pid=S0100-](http://www.scielo.br/scielo.php?script=sci_arttext&pid=S0100-879X2008000800011&lng=en&tlng=en)  
656 [879X2008000800011&lng=en&tlng=en](http://www.scielo.br/scielo.php?script=sci_arttext&pid=S0100-879X2008000800011&lng=en&tlng=en)
- 657 14. Mansoor N, Abel B, Scriba TJ, et al. Significantly skewed memory CD8+ T cell  
658 subsets in HIV-1 infected infants during the first year of life. Clin Immunol  
659 [Internet]. 2009 Mar;130(3):280–9. Available from:  
660 <http://www.ncbi.nlm.nih.gov/pubmed/18996749>
- 661 15. Akbar AN, Fletcher JM. Memory T cell homeostasis and senescence during  
662 aging. Curr Opin Immunol [Internet]. 2005 Oct;17(5):480–5. Available from:  
663 <http://www.ncbi.nlm.nih.gov/pubmed/16098721>
- 664 16. Afran L, Garcia Knight M, Nduati E, Urban BC, Heyderman RS, Rowland-  
665 Jones SL. HIV-exposed uninfected children: a growing population with a  
666 vulnerable immune system? Clin Exp Immunol [Internet]. 2014 Apr;176(1):11–  
667 22. Available from: <http://www.ncbi.nlm.nih.gov/pubmed/24325737>
- 668 17. Slogrove AL, Powis KM, Johnson LF, Stover J, Mahy M. Estimates of the  
669 global population of children who are HIV-exposed and uninfected, 2000–18: a  
670 modelling study. Lancet Glob Heal [Internet]. 2020 Jan;8(1):e67–75. Available  
671 from: <https://linkinghub.elsevier.com/retrieve/pii/S2214109X19304486>
- 672 18. Kintu K, Malaba TR, Nakibuka J, et al. Dolutegravir versus efavirenz in women  
673 starting HIV therapy in late pregnancy (DoIPHIN-2): an open-label, randomised  
674 controlled trial. Lancet HIV [Internet]. 2020 May;7(5):e332–9. Available from:  
675 <https://linkinghub.elsevier.com/retrieve/pii/S2352301820300503>
- 676 19. Tilburgs T, Crespo ÂC, van der Zwan A, et al. Human HLA-G+ extravillous  
677 trophoblasts: Immune-activating cells that interact with decidual leukocytes.

- 678 Proc Natl Acad Sci [Internet]. 2015 Jun 9;112(23):7219–24. Available from:  
679 <http://www.pnas.org/lookup/doi/10.1073/pnas.1507977112>
- 680 20. Khong TY, Mooney EE, Ariel I, et al. Sampling and Definitions of Placental  
681 Lesions: Amsterdam Placental Workshop Group Consensus Statement. Arch  
682 Pathol Lab Med [Internet]. 2016 Jul;140(7):698–713. Available from:  
683 <http://www.archivesofpathology.org/doi/10.5858/arpa.2015-0225-CC>
- 684 21. Ikumi NM, Malaba TR, Pillay K, et al. Differential impact of antiretroviral  
685 therapy initiated before or during pregnancy on placenta pathology in HIV-  
686 positive women. AIDS [Internet]. 2021 Feb 3; Publish Ah. Available from:  
687 <https://journals.lww.com/10.1097/QAD.0000000000002824>
- 688 22. R Core Team. R: A language and environment for statistical computing  
689 [Internet]. Vienna, Austria: R Foundation for Statistical Computing; 2020.  
690 Available from: <https://www.r-project.org/>
- 691 23. Enninga EAL, Raber P, Quinton RA, et al. Maternal T Cells in the Human  
692 Placental Villi Support an Allograft Response during Noninfectious Villitis. J  
693 Immunol [Internet]. 2020 Jun 1;204(11):2931–9. Available from:  
694 <http://www.jimmunol.org/lookup/doi/10.4049/jimmunol.1901297>
- 695 24. Tamblyn JA, Lissauer DM, Powell R, Cox P, Kilby MD. The immunological  
696 basis of villitis of unknown etiology – Review. Placenta [Internet]. 2013  
697 Oct;34(10):846–55. Available from:  
698 <https://linkinghub.elsevier.com/retrieve/pii/S0143400413005894>
- 699 25. Ander SE, Diamond MS, Coyne CB. Immune responses at the maternal-fetal  
700 interface. Sci Immunol [Internet]. 2019 Jan 11;4(31):eaat6114. Available from:  
701 <http://immunology.sciencemag.org/lookup/doi/10.1126/sciimmunol.aat6114>
- 702 26. Huang Y, Zhu X-Y, Du M-R, Li D-J. Human trophoblasts recruited T

- 703 lymphocytes and monocytes into decidua by secretion of chemokine CXCL16  
704 and interaction with CXCR6 in the first-trimester pregnancy. *J Immunol*  
705 [Internet]. 2008 Feb 15;180(4):2367–75. Available from:  
706 <http://www.ncbi.nlm.nih.gov/pubmed/18250446>
- 707 27. Tilburgs T, Strominger JL. CD8+ Effector T Cells at the Fetal-Maternal  
708 Interface, Balancing Fetal Tolerance and Antiviral Immunity. *Am J Reprod*  
709 *Immunol* [Internet]. 2013 Apr;69(4):395–407. Available from:  
710 <http://doi.wiley.com/10.1111/aji.12094>
- 711 28. White JT, Cross EW, Kedl RM. Antigen-inexperienced memory CD8+ T cells:  
712 where they come from and why we need them. *Nat Rev Immunol* [Internet].  
713 2017 Jun;17(6):391–400. Available from:  
714 <http://www.ncbi.nlm.nih.gov/pubmed/28480897>
- 715 29. Dawe GS, Tan XW, Xiao Z-C. Cell migration from baby to mother. *Cell Adh*  
716 *Migr* [Internet]. 2007;1(1):19–27. Available from:  
717 <http://www.ncbi.nlm.nih.gov/pubmed/19262088>
- 718 30. Acharya G, Sonesson S-E, Flo K, Räsänen J, Odibo A. Hemodynamic aspects  
719 of normal human fetoplacental (umbilical) circulation. *Acta Obstet Gynecol*  
720 *Scand* [Internet]. 2016 Jun;95(6):672–82. Available from:  
721 <http://doi.wiley.com/10.1111/aogs.12919>
- 722 31. Nielsen SD, Jeppesen DL, Kolte L, et al. Impaired progenitor cell function in  
723 HIV-negative infants of HIV-positive mothers results in decreased thymic  
724 output and low CD4 counts. *Blood* [Internet]. 2001 Jul 15;98(2):398–404.  
725 Available from: <http://www.ncbi.nlm.nih.gov/pubmed/11435309>
- 726 32. Evans C, Jones CE, Prendergast AJ. HIV-exposed, uninfected infants: new  
727 global challenges in the era of paediatric HIV elimination. *Lancet Infect Dis*



- 728 [Internet]. 2016 Jun;16(6):e92–107. Available from:  
729 <https://linkinghub.elsevier.com/retrieve/pii/S1473309916000554>
- 730 33. Kuhn L, Coutsooudis A, Moodley D, et al. T-helper cell responses to HIV  
731 envelope peptides in cord blood: protection against intrapartum and breast-  
732 feeding transmission. *AIDS* [Internet]. 2001 Jan 5;15(1):1–9. Available from:  
733 <http://www.ncbi.nlm.nih.gov/pubmed/11192849>
- 734 34. Holditch SJ, Eriksson EM, Tarosso LF, et al. Decay kinetics of HIV-1 specific T  
735 cell responses in vertically HIV-1 exposed seronegative infants. *Front Immunol*  
736 [Internet]. 2011;2:94. Available from:  
737 <http://www.ncbi.nlm.nih.gov/pubmed/22566883>
- 738 35. Huo Y, Patel K, Scott GB, et al. Lymphocyte subsets in HIV-exposed  
739 uninfected infants and HIV-unexposed uninfected infants. *J Allergy Clin*  
740 *Immunol* [Internet]. 2017 Aug;140(2):605-608.e3. Available from:  
741 <https://linkinghub.elsevier.com/retrieve/pii/S009167491730338X>
- 742 36. Borges-Almeida E, Milanez HM, Vilela MMS, et al. The impact of maternal HIV  
743 infection on cord blood lymphocyte subsets and cytokine profile in exposed  
744 non-infected newborns. *BMC Infect Dis* [Internet]. 2011 Dec 3;11(1):38.  
745 Available from: [http://bmcinfectdis.biomedcentral.com/articles/10.1186/1471-](http://bmcinfectdis.biomedcentral.com/articles/10.1186/1471-2334-11-38)  
746 [2334-11-38](http://bmcinfectdis.biomedcentral.com/articles/10.1186/1471-2334-11-38)
- 747 37. Waitt C, Orrell C, Walimbwa S, et al. Safety and pharmacokinetics of  
748 dolutegravir in pregnant mothers with HIV infection and their neonates: A  
749 randomised trial (DolPHIN-1 study). Mofenson LM, editor. *PLOS Med*  
750 [Internet]. 2019 Sep 20;16(9):e1002895. Available from:  
751 <https://dx.plos.org/10.1371/journal.pmed.1002895>
- 752 38. Kreitchmann R, Schalkwijk S, Best B, et al. Efavirenz pharmacokinetics during

- 753 pregnancy and infant washout. *Antivir Ther* [Internet]. 2018;24(2):95–103.  
754 Available from:  
755 <https://www.intmedpress.com/journals/avt/abstract.cfm?id=3283&pid=48>
- 756 39. Pacheco SE, McIntosh K, Lu M, et al. Effect of Perinatal Antiretroviral Drug  
757 Exposure on Hematologic Values in HIV-Uninfected Children: An Analysis of  
758 the Women and Infants Transmission Study. *J Infect Dis* [Internet]. 2006 Oct  
759 15;194(8):1089–97. Available from: [https://academic.oup.com/jid/article-](https://academic.oup.com/jid/article-lookup/doi/10.1086/507645)  
760 [lookup/doi/10.1086/507645](https://academic.oup.com/jid/article-lookup/doi/10.1086/507645)
- 761 40. Bonney EA, Pudney J, Anderson DJ, Hill JA. Gamma-Delta T Cells in  
762 Midgestation Human Placental Villi. *Gynecol Obstet Invest* [Internet].  
763 2000;50(3):153–7. Available from:  
764 <https://www.karger.com/Article/FullText/10315>
- 765 41. Pique-Regi R, Romero R, Tarca AL, et al. Single cell transcriptional signatures  
766 of the human placenta in term and preterm parturition. *Elife* [Internet]. 2019  
767 Dec 12;8. Available from: <https://elifesciences.org/articles/52004>
- 768 42. Ernst LM. Maternal vascular malperfusion of the placental bed. *APMIS*  
769 [Internet]. 2018 Jul;126(7):551–60. Available from:  
770 <http://doi.wiley.com/10.1111/apm.12833>
- 771 43. Weckman AM, Ngai M, Wright J, McDonald CR, Kain KC. The Impact of  
772 Infection in Pregnancy on Placental Vascular Development and Adverse Birth  
773 Outcomes. *Front Microbiol* [Internet]. 2019 Aug 22;10. Available from:  
774 <https://www.frontiersin.org/article/10.3389/fmicb.2019.01924/full>  
775  
776

777 **Table 1: Maternal and infant characteristics**

|                                                | HIV-Uninfected<br>N=9 | HIV-Infected<br>N=21 | P-Value      |
|------------------------------------------------|-----------------------|----------------------|--------------|
| Age, years                                     |                       |                      | 1.0          |
| ≤24                                            | 1 (11.1)              | 2 (9.5)              |              |
| 25-29                                          | 5 (55.6)              | 11 (52.4)            |              |
| ≥30                                            | 3 (33.3)              | 8 (38.1)             |              |
| Median (IQR)                                   | 29 (25 - 31)          | 29 (26 - 30)         |              |
| Median gestation at enrolment                  | 30 (26 - 32)          | 28 (28 - 31)         | 0.6          |
| Gravidity                                      |                       |                      | <b>0.003</b> |
| 1                                              | 5 (55.6)              | 1 (4.8)              |              |
| 2                                              | 3 (33.3)              | 7 (33.3)             |              |
| ≥3                                             | 1 (11.1)              | 13 (61.9)            |              |
| Median (IQR)                                   | 1 (1 - 2)             | 3 (2 - 3)            |              |
| <b>Infant Characteristics</b>                  |                       |                      |              |
| Sex                                            |                       |                      | 1.0          |
| Female                                         | 6 (66.7)              | 12 (57.1)            |              |
| Male                                           | 3 (33.3)              | 6 (28.6)             |              |
| Missing                                        | 0 (0)                 | 3 (14.3)             |              |
| Median gestation at delivery (completed weeks) | 40 (40)               | 39 (38 - 39)         | <b>0.003</b> |
| Birthweight in grams, Median (IQR)             | 3420 (3420 - 4000)    | 3305 (3010 - 3570)   | 0.07         |

778

779

780 **Table 2: Placental characteristics and pathology at delivery**

|                                                | HIV-Uninfected<br>N=9 | HIV-Infected<br>N=21 | P-Value     |
|------------------------------------------------|-----------------------|----------------------|-------------|
| Placental basal plate weight (g), median (IQR) | 468 (426 - 533)       | 394 (343 - 469)      | <b>0.02</b> |
| Placental weight (g)                           |                       |                      | <b>0.03</b> |
| Small (<10 <sup>th</sup> percentile)           | 0 (0)                 | 8 (38.1)             |             |
| Appropriate (10 - 90 <sup>th</sup> percentile) | 9 (100.0)             | 12 (57.1)            |             |
| Large (>90 <sup>th</sup> percentile)           | 0 (0)                 | 0 (0)                |             |
| Missing                                        | 0 (0)                 | 1 (4.8)              |             |
| Fetal-Placenta weight ratio                    |                       |                      | <b>0.02</b> |
| Small (<10 <sup>th</sup> percentile)           | 1 (11.1)              | 0 (0)                |             |
| Appropriate (10 - 90 <sup>th</sup> percentile) | 8 (88.9)              | 11 (52.4)            |             |
| Large (>90 <sup>th</sup> percentile)           | 0 (0)                 | 7 (33.3)             |             |
| Missing                                        | 0 (0)                 | 3 (14.9)             |             |
| Placenta greatest diameter (mm), median (IQR)  | 180 (172 - 210)       | 180 (170 - 199)      | 0.6         |
| Placenta thickness (mm), median (IQR)          | 20 (15 - 20)          | 25 (16.5 - 27.5)     | 0.2         |
| Cord insertion                                 |                       |                      | 0.7         |
| Central                                        | 3 (33.3)              | 3 (33.3)             |             |
| Off centre                                     | 5 (55.6)              | 12 (57.1)            |             |
| Marginal                                       | 1 (11.1)              | 5 (23.8)             |             |
| Missing                                        | 0 (0)                 | 1 (4.76)             |             |
| <b>Meconium exposure</b>                       |                       |                      | 0.1         |
| +                                              | 3 (33.3)              | 2 (9.5)              |             |
| -                                              | 6 (66.7)              | 19 (90.5)            |             |
| <b>Chorioamnionitis</b>                        |                       |                      |             |
| <i>Maternal Inflammatory Response</i>          |                       |                      | 0.6         |
| +                                              | 2 (22.2)              | 2 (9.5)              |             |
| -                                              | 7 (77.8)              | 19 (90.5)            |             |
| <i>Fetal Inflammatory Response</i>             |                       |                      | 0.6         |
| +                                              | 2 (22.2)              | 3 (14.3)             |             |
| -                                              | 7 (77.8)              | 18 (85.7)            |             |
| <b>Chronic Deciduitis</b>                      |                       |                      | 0.5         |
| +                                              | 0 (0)                 | 2 (9.5)              |             |
| -                                              | 9 (100)               | 19 (90.5)            |             |
| <b>Maternal Vascular Malperfusion</b>          |                       |                      | 0.09        |
| +                                              | 0 (0)                 | 6 (28.6)             |             |
| -                                              | 9 (100)               | 15 (71.4)            |             |
| <b>Villitis of Unknown Etiology</b>            |                       |                      | 1.0         |
| +                                              | 0 (0)                 | 0 (0)                |             |
| -                                              | 9 (100)               | 21 (100)             |             |

781

782

783

# Figure 1

## A CD3+CD4+CD8- T cells

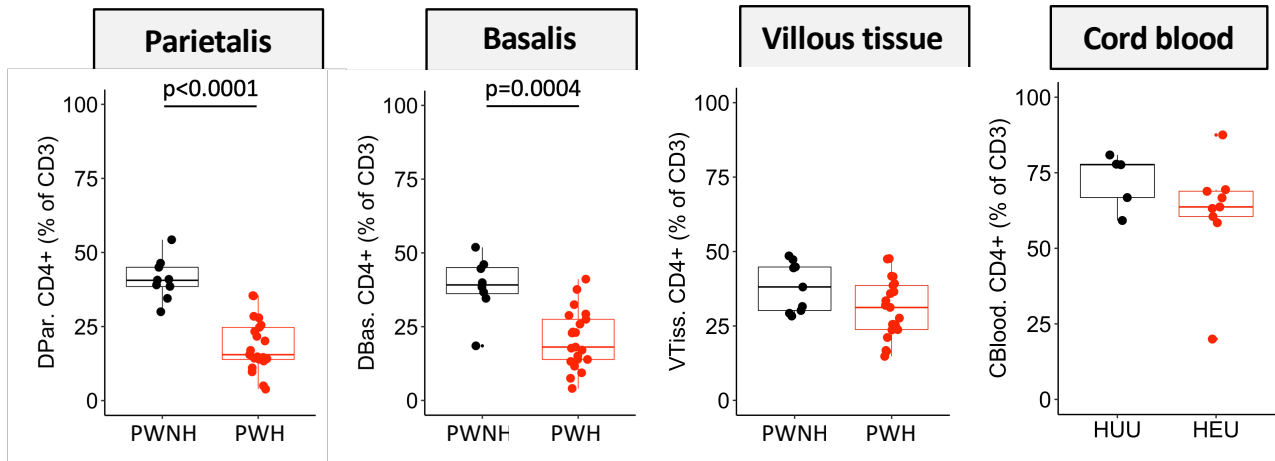

## CD3+CD4-CD8+ T cells

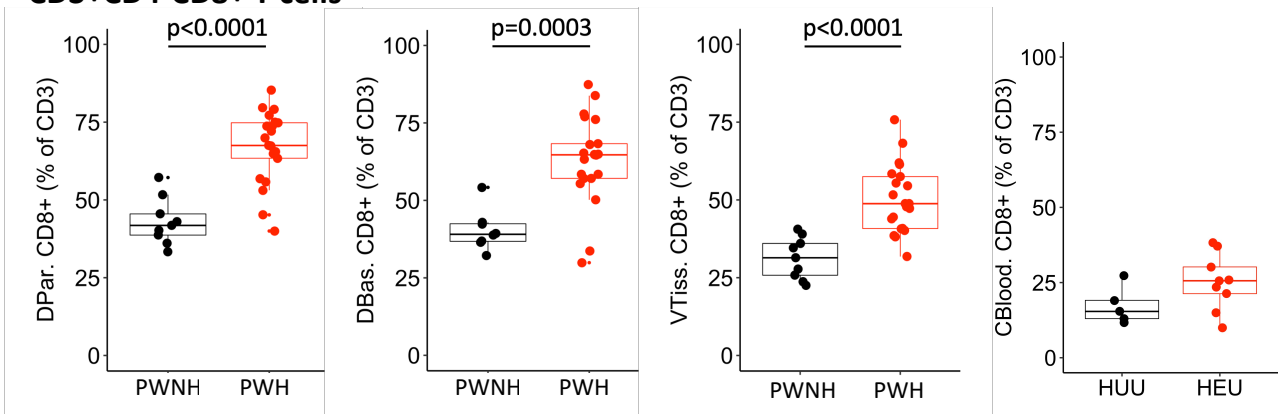

## B CD4:CD8 T cell ratio

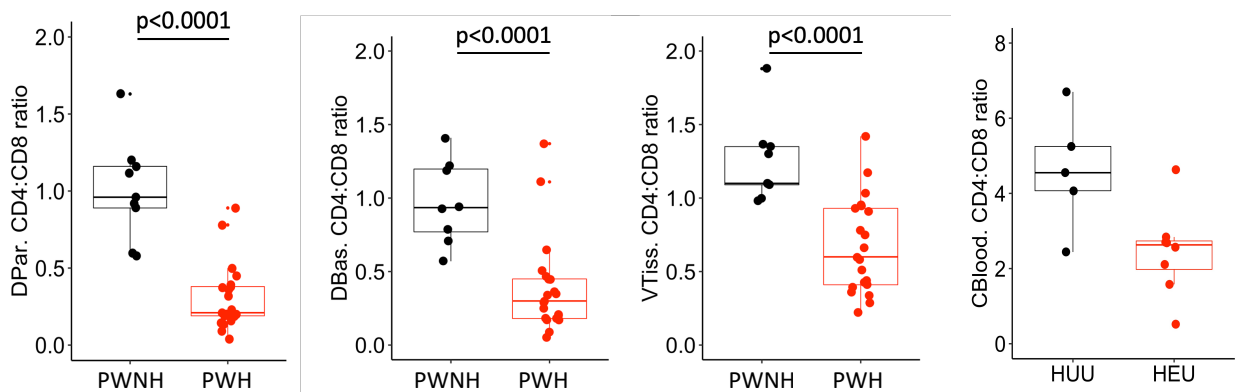

# Figure 1

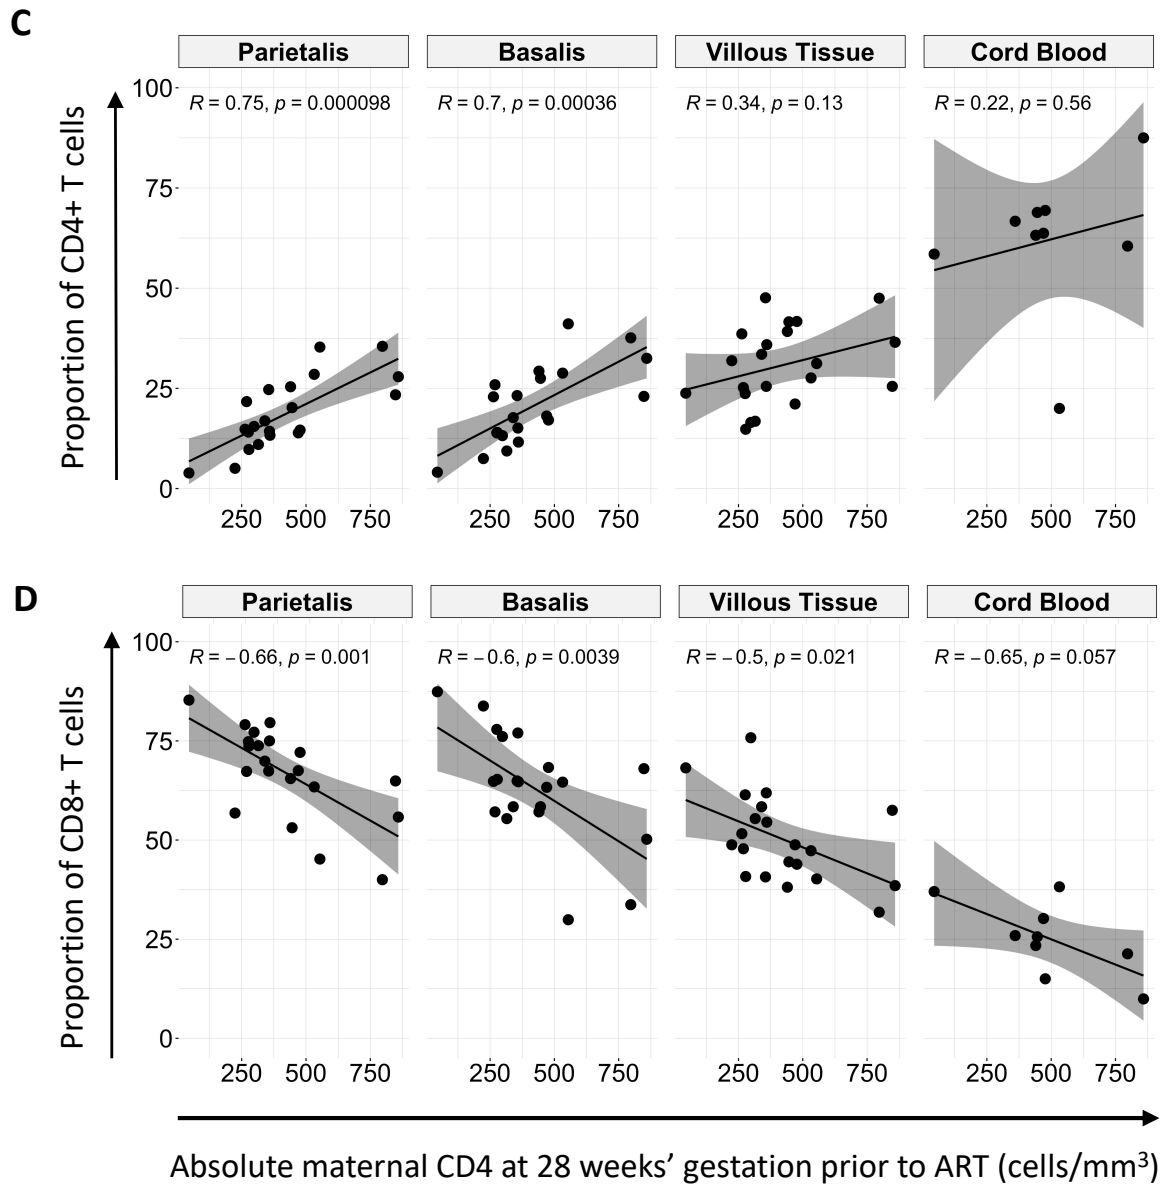

## Figure 2

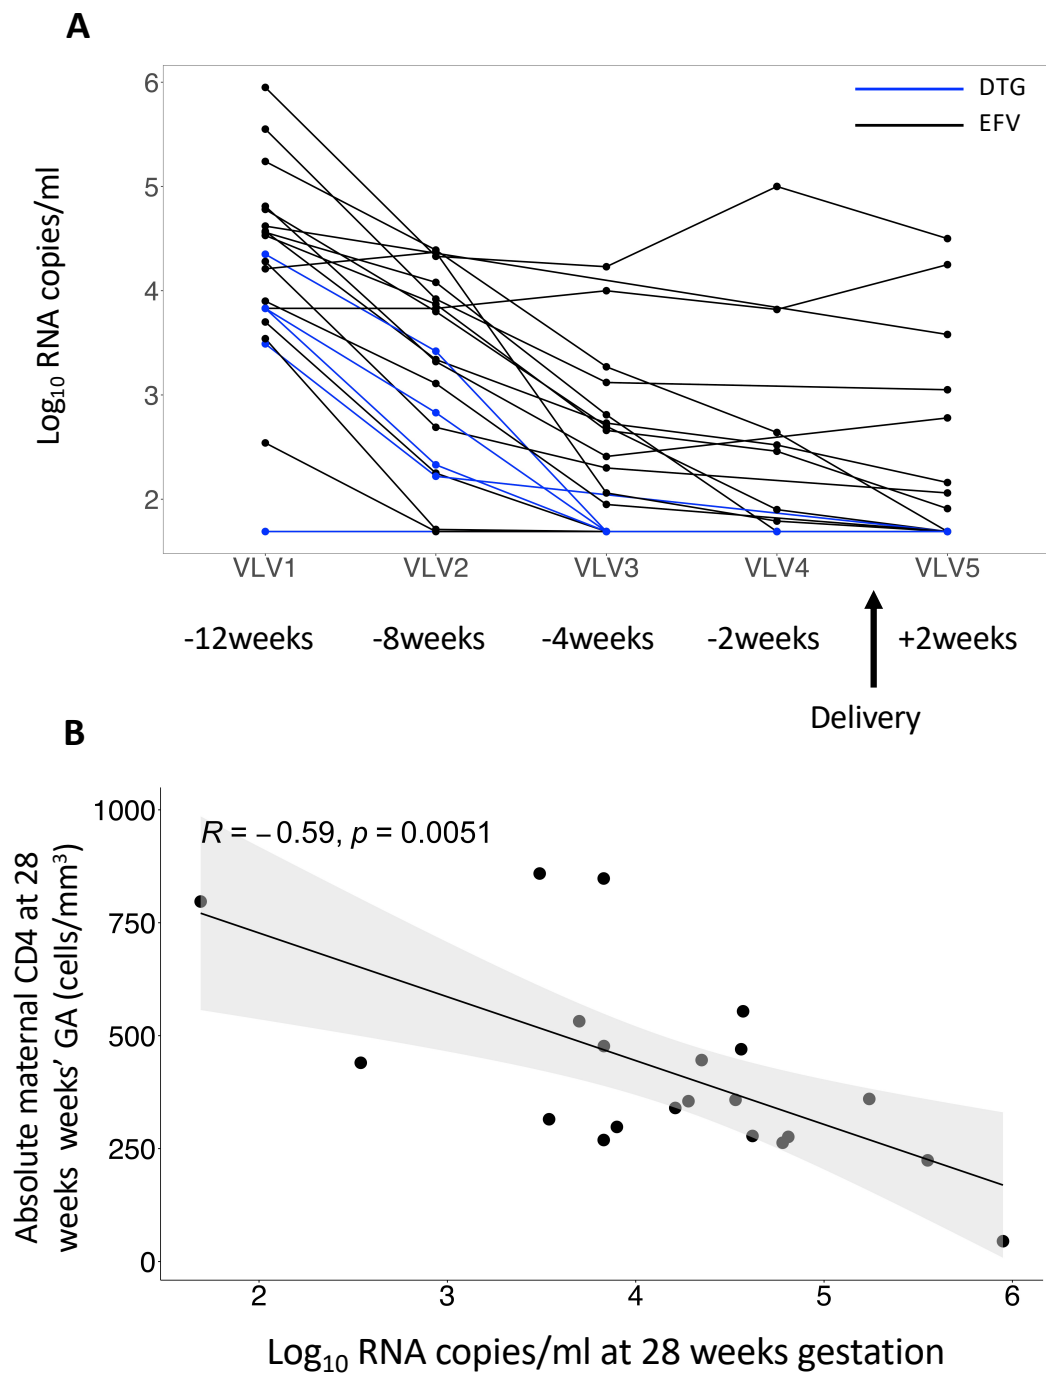

## Figure 2

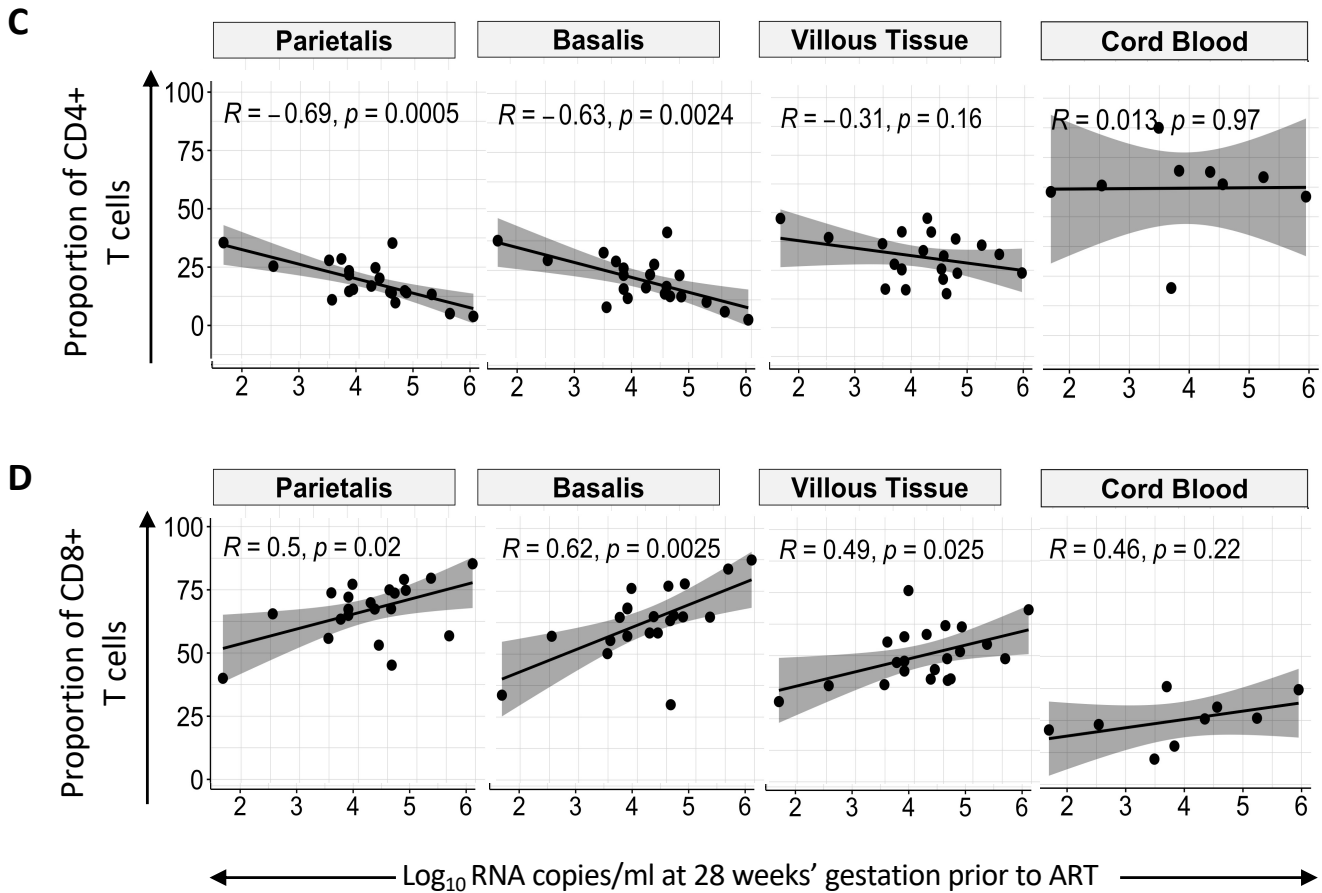



### Figure 3

medRxiv preprint doi: <https://doi.org/10.1101/2021.01.04.21249198>; this version posted April 16, 2021. The copyright holder for this preprint (which was not certified by peer review) is the author/funder, who has granted medRxiv a license to display the preprint in perpetuity. It is made available under a [CC-BY-ND 4.0 International license](https://creativecommons.org/licenses/by-nd/4.0/).

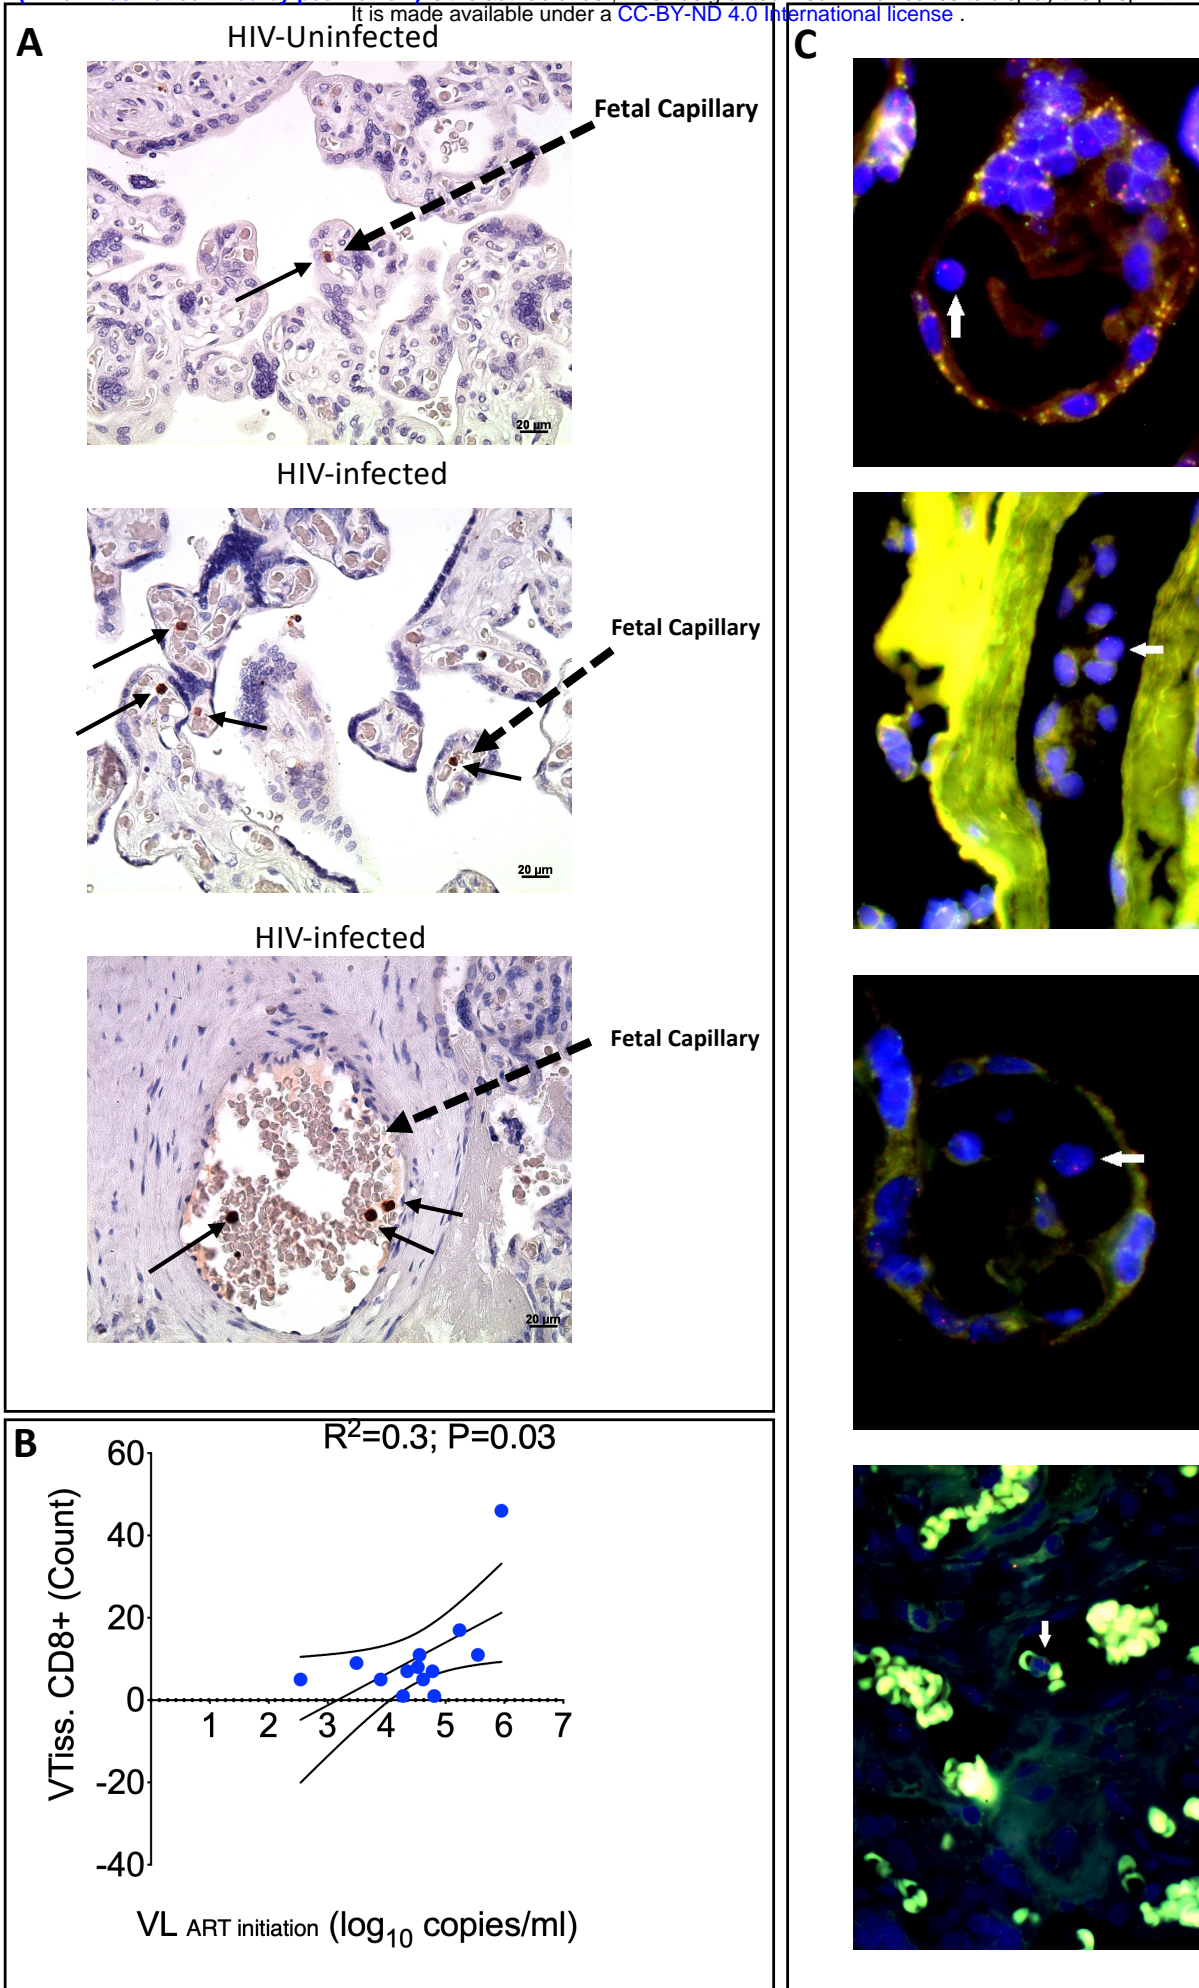

## Figure 4

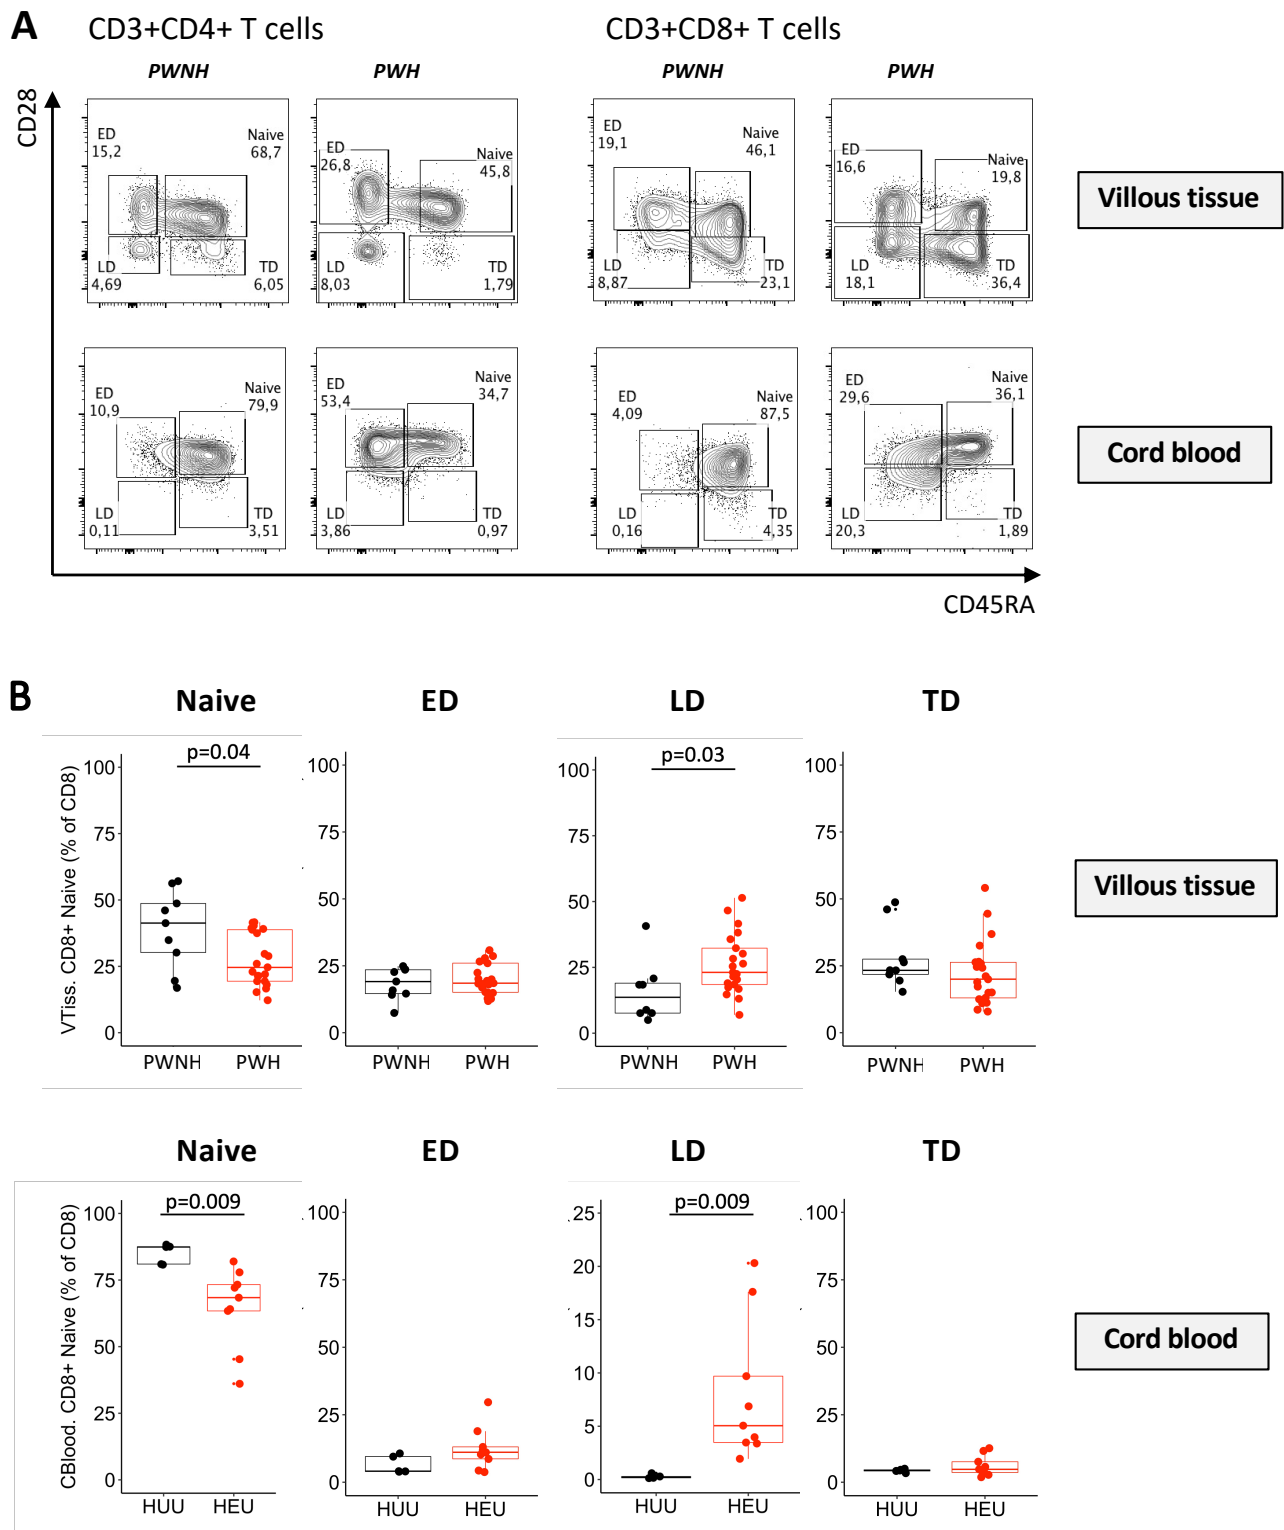

Source: https://medrxiv.org/content/10.1101/2021.01.04.21249198v2.full.pdf
